# Supplementary material for: Predicting Early-Onset Colorectal Cancer in Individuals Below Screening Age Using Machine Learning and Real-World Data
Source: bioRxiv or medRxiv preprint supplement (doi:10.1101/2024.07.17.24310573), 2024-07-17
Supplement: Supplementary file [file media-1.pdf]

## Supplementary Information: Predicting Early-Onset Colorectal Cancer in Individuals Below Screening Age Using Machine Learning and Real-World Data

Chengkun Sun<sup>1</sup>, Erin M. Mobley, Ph.D.<sup>2</sup>, Michael B Quillen<sup>3</sup>, Max Parker<sup>3</sup>, Meghan Daly, M.D.<sup>2</sup>, Rui Wang, Ph.D.<sup>4</sup>, Naz Tursun, M.D.<sup>2</sup>, Ziad Awad, M.D.<sup>2</sup>, Jennifer Fishe, M.D.<sup>4</sup>, Alexander Parker, Ph.D.<sup>6</sup>, Thomas J George, M.D.<sup>3</sup>, Jiang Bian, Ph.D.<sup>1</sup> and Jie Xu, Ph.D.<sup>1,\*</sup>

<sup>1</sup> Department of Health Outcomes & Biomedical Informatics, College of Medicine, University of Florida, Gainesville, FL 32611;

<sup>2</sup> Department of Surgery, College of Medicine, University of Florida, Jacksonville, FL 32209;

<sup>3</sup> Department of Medicine, College of Medicine, University of Florida, Gainesville, FL 32611;

<sup>4</sup> Department of Emergency Medicine, College of Medicine, University of Florida, Jacksonville, FL 32209;

<sup>5</sup> Center for Data Solutions, College of Medicine, University of Florida, Jacksonville, FL 32209;

<sup>6</sup> College of Medicine, University of Florida, Jacksonville, FL 32209;

\* Correspondence: [xujie@ufl.edu](mailto:xujie@ufl.edu);

**Table S1.** The performance of CC prediction using ML models across different prediction windows (0, 1, 3, and 5 years), excluding CRC-related features.

| Prediction Window | Model   | AUC (95% CI)                         | Sensitivity (95% CI)                 | Specificity (95% CI)                 | PPV (95% CI)                         | NPV (95% CI)                         | F1 (95% CI)                          |
|-------------------|---------|--------------------------------------|--------------------------------------|--------------------------------------|--------------------------------------|--------------------------------------|--------------------------------------|
| 0-year            | LR      | 0.809<br>(0.806,0.812)               | 0.674<br>(0.663,0.685)               | 0.807<br>(0.796,0.818)               | 0.421<br>(0.41,0.433)                | 0.926<br>(0.924,0.928)               | <b>0.849</b><br><b>(0.847,0.851)</b> |
|                   | SVM     | 0.748<br>(0.745,0.751)               | 0.633<br>(0.62,0.647)                | 0.754<br>(0.742,0.767)               | 0.347<br>(0.338,0.356)               | 0.912<br>(0.91,0.914)                | 0.822<br>(0.82,0.824)                |
|                   | RF      | <b>0.811</b><br><b>(0.808,0.814)</b> | <b>0.686</b><br><b>(0.673,0.698)</b> | 0.791<br>(0.779,0.804)               | 0.407<br>(0.396,0.418)               | <b>0.927</b><br><b>(0.925,0.929)</b> | 0.78<br>(0.778,0.783)                |
|                   | XGBoost | 0.802<br>(0.799,0.806)               | 0.61<br>(0.601,0.619)                | <b>0.887</b><br><b>(0.879,0.895)</b> | <b>0.533</b><br><b>(0.518,0.548)</b> | 0.92<br>(0.918,0.921)                | 0.758<br>(0.755,0.76)                |
| 1-year            | LR      | 0.733<br>(0.73,0.736)                | 0.595<br>(0.581,0.609)               | 0.758<br>(0.745,0.772)               | 0.338<br>(0.33,0.347)                | <b>0.904</b><br><b>(0.902,0.906)</b> | <b>0.816</b><br><b>(0.814,0.819)</b> |
|                   | SVM     | 0.689<br>(0.685,0.692)               | 0.534<br>(0.514,0.554)               | 0.763<br>(0.745,0.782)               | 0.329<br>(0.317,0.342)               | 0.893<br>(0.89,0.895)                | 0.797<br>(0.795,0.799)               |
|                   | RF      | <b>0.748</b><br><b>(0.745,0.751)</b> | <b>0.613</b><br><b>(0.597,0.63)</b>  | 0.758<br>(0.742,0.774)               | 0.351<br>(0.338,0.363)               | 0.909<br>(0.906,0.911)               | 0.763<br>(0.76,0.765)                |
|                   | XGBoost | 0.745<br>(0.741,0.748)               | 0.561<br>(0.546,0.576)               | <b>0.816</b><br><b>(0.801,0.831)</b> | <b>0.401</b><br><b>(0.384,0.417)</b> | <b>0.904</b><br><b>(0.902,0.906)</b> | 0.758<br>(0.755,0.76)                |
| 3-year            | LR      | 0.683<br>(0.679,0.688)               | <b>0.574</b><br><b>(0.554,0.593)</b> | 0.713<br>(0.695,0.731)               | 0.296<br>(0.288,0.305)               | <b>0.894</b><br><b>(0.891,0.897)</b> | <b>0.789</b><br><b>(0.786,0.792)</b> |
|                   | SVM     | 0.614<br>(0.61,0.618)                | 0.487<br>(0.466,0.508)               | 0.709<br>(0.688,0.73)                | 0.262<br>(0.254,0.27)                | 0.874<br>(0.871,0.876)               | 0.767<br>(0.765,0.77)                |
|                   | RF      | <b>0.689</b><br><b>(0.684,0.694)</b> | 0.42<br>(0.405,0.435)                | <b>0.885</b><br><b>(0.872,0.898)</b> | <b>0.45</b><br><b>(0.433,0.467)</b>  | 0.884<br>(0.882,0.886)               | 0.763<br>(0.76,0.766)                |
|                   | XGBoost | <b>0.689</b><br><b>(0.684,0.694)</b> | 0.455<br>(0.434,0.475)               | 0.845<br>(0.825,0.864)               | 0.414<br>(0.393,0.435)               | 0.886<br>(0.884,0.888)               | 0.757<br>(0.754,0.759)               |
| 5-year            | LR      | 0.674<br>(0.668,0.679)               | <b>0.59</b><br><b>(0.565,0.616)</b>  | 0.688<br>(0.664,0.712)               | 0.29<br>(0.28,0.3)                   | <b>0.895</b><br><b>(0.892,0.899)</b> | <b>0.793</b><br><b>(0.789,0.796)</b> |
|                   | SVM     | 0.616<br>(0.61,0.621)                | 0.57<br>(0.542,0.597)                | 0.637<br>(0.61,0.664)                | 0.251<br>(0.242,0.259)               | 0.883<br>(0.879,0.887)               | 0.767<br>(0.764,0.77)                |
|                   | RF      | <b>0.686</b><br><b>(0.68,0.692)</b>  | 0.552<br>(0.528,0.575)               | 0.753<br>(0.732,0.775)               | 0.333<br>(0.317,0.348)               | <b>0.895</b><br><b>(0.892,0.898)</b> | 0.758<br>(0.754,0.761)               |
|                   | XGBoost | 0.657<br>(0.651,0.663)               | 0.406<br>(0.388,0.425)               | <b>0.874</b><br><b>(0.858,0.89)</b>  | <b>0.436</b><br><b>(0.413,0.459)</b> | 0.881<br>(0.878,0.883)               | 0.757<br>(0.754,0.76)                |

**Table S2.** The performance of CC prediction using ML models across different prediction windows (0, 1, 3, and 5 years), excluding cancer-related features.

| Prediction Window | Model   | AUC (95% CI)                           | Sensitivity (95% CI)                   | Specificity (95% CI)                   | PPV (95% CI)                           | NPV (95% CI)                           | F1 (95% CI)                            |
|-------------------|---------|----------------------------------------|----------------------------------------|----------------------------------------|----------------------------------------|----------------------------------------|----------------------------------------|
| 0-year            | LR      | <b>0.788</b><br>( <b>0.786,0.791</b> ) | 0.672<br>(0.661,0.683)                 | 0.777<br>(0.766,0.787)                 | 0.382<br>(0.373,0.391)                 | <b>0.923</b><br>( <b>0.921,0.925</b> ) | <b>0.829</b><br>( <b>0.827,0.831</b> ) |
|                   | SVM     | 0.725<br>(0.722,0.729)                 | 0.63<br>(0.616,0.645)                  | 0.725<br>(0.712,0.738)                 | 0.32<br>(0.312,0.327)                  | 0.908<br>(0.906,0.911)                 | 0.809<br>(0.807,0.811)                 |
|                   | RF      | 0.77<br>(0.767,0.773)                  | <b>0.7</b><br>( <b>0.684,0.715</b> )   | 0.71<br>(0.695,0.726)                  | 0.333<br>(0.325,0.342)                 | <b>0.923</b><br>( <b>0.921,0.926</b> ) | 0.758<br>(0.756,0.761)                 |
|                   | XGBoost | 0.76<br>(0.757,0.764)                  | 0.595<br>(0.583,0.607)                 | <b>0.82</b><br>( <b>0.809,0.831</b> )  | <b>0.407</b><br>( <b>0.397,0.417</b> ) | 0.911<br>(0.909,0.913)                 | 0.758<br>(0.755,0.76)                  |
| 1-year            | LR      | 0.713<br>(0.71,0.716)                  | 0.601<br>(0.587,0.616)                 | <b>0.721</b><br>( <b>0.707,0.736</b> ) | <b>0.307</b><br>( <b>0.301,0.314</b> ) | 0.901<br>(0.899,0.903)                 | <b>0.804</b><br>( <b>0.801,0.806</b> ) |
|                   | SVM     | 0.646<br>(0.643,0.65)                  | 0.549<br>(0.533,0.566)                 | 0.686<br>(0.67,0.702)                  | 0.263<br>(0.258,0.269)                 | 0.885<br>(0.882,0.887)                 | 0.777<br>(0.775,0.779)                 |
|                   | RF      | <b>0.716</b><br>( <b>0.713,0.719</b> ) | <b>0.654</b><br>( <b>0.639,0.668</b> ) | 0.671<br>(0.657,0.685)                 | 0.289<br>(0.282,0.296)                 | <b>0.907</b><br>( <b>0.905,0.91</b> )  | 0.758<br>(0.755,0.76)                  |
|                   | XGBoost | 0.714<br>(0.711,0.717)                 | 0.614<br>(0.599,0.629)                 | 0.707<br>(0.691,0.722)                 | 0.301<br>(0.294,0.309)                 | 0.902<br>(0.9,0.905)                   | 0.758<br>(0.755,0.76)                  |
| 3-year            | LR      | 0.669<br>(0.665,0.674)                 | 0.575<br>(0.554,0.596)                 | 0.69<br>(0.67,0.71)                    | 0.281<br>(0.273,0.29)                  | 0.891<br>(0.888,0.894)                 | <b>0.783</b><br>( <b>0.78,0.786</b> )  |
|                   | SVM     | 0.604<br>(0.6,0.608)                   | 0.523<br>(0.496,0.55)                  | 0.656<br>(0.629,0.683)                 | 0.246<br>(0.238,0.254)                 | 0.874<br>(0.871,0.877)                 | 0.773<br>(0.771,0.775)                 |
|                   | RF      | <b>0.684</b><br>( <b>0.679,0.688</b> ) | <b>0.587</b><br>( <b>0.565,0.61</b> )  | 0.692<br>(0.671,0.714)                 | 0.29<br>(0.279,0.3)                    | <b>0.895</b><br>( <b>0.892,0.898</b> ) | 0.764<br>(0.761,0.767)                 |
|                   | XGBoost | 0.662<br>(0.657,0.666)                 | 0.494<br>(0.469,0.518)                 | <b>0.758</b><br>( <b>0.735,0.781</b> ) | <b>0.313</b><br>( <b>0.3,0.325</b> )   | 0.883<br>(0.88,0.886)                  | 0.757<br>(0.754,0.759)                 |
| 5-year            | LR      | 0.661<br>(0.656,0.667)                 | <b>0.606</b><br>( <b>0.581,0.63</b> )  | 0.656<br>(0.631,0.68)                  | 0.272<br>(0.263,0.282)                 | <b>0.895</b><br>( <b>0.891,0.898</b> ) | <b>0.777</b><br>( <b>0.773,0.78</b> )  |
|                   | SVM     | 0.611<br>(0.606,0.617)                 | 0.597<br>(0.566,0.629)                 | 0.6<br>(0.568,0.632)                   | 0.242<br>(0.234,0.251)                 | 0.885<br>(0.881,0.889)                 | 0.766<br>(0.762,0.769)                 |
|                   | RF      | <b>0.663</b><br>( <b>0.658,0.668</b> ) | 0.596<br>(0.569,0.623)                 | 0.668<br>(0.643,0.693)                 | 0.281<br>(0.269,0.294)                 | 0.894<br>(0.891,0.898)                 | 0.757<br>(0.754,0.76)                  |
|                   | XGBoost | 0.643<br>(0.638,0.648)                 | 0.532<br>(0.505,0.558)                 | <b>0.706</b><br>( <b>0.68,0.731</b> )  | <b>0.283</b><br>( <b>0.272,0.293</b> ) | 0.885<br>(0.881,0.888)                 | 0.757<br>(0.754,0.76)                  |

**Table S3.** The performance of RC prediction using ML models across different prediction windows (0, 1, 3, and 5 years), excluding CRC-related.

| Prediction Window | Model   | AUC (95% CI)                         | Sensitivity (95% CI)                 | Specificity (95% CI)                 | PPV (95% CI)                         | NPV (95% CI)                         | F1 (95% CI)                          |
|-------------------|---------|--------------------------------------|--------------------------------------|--------------------------------------|--------------------------------------|--------------------------------------|--------------------------------------|
| 0-year            | LR      | 0.819<br>(0.815,0.824)               | 0.688<br>(0.674,0.701)               | 0.839<br>(0.827,0.851)               | <b>0.48</b><br><b>(0.462,0.498)</b>  | 0.932<br>(0.929,0.934)               | <b>0.858</b><br><b>(0.855,0.861)</b> |
|                   | SVM     | 0.78<br>(0.774,0.785)                | 0.684<br>(0.672,0.696)               | 0.761<br>(0.746,0.775)               | 0.379<br>(0.366,0.392)               | 0.927<br>(0.924,0.93)                | 0.838<br>(0.835,0.841)               |
|                   | RF      | 0.826<br>(0.822,0.83)                | <b>0.7</b><br><b>(0.688,0.713)</b>   | 0.826<br>(0.812,0.841)               | 0.469<br>(0.452,0.487)               | <b>0.934</b><br><b>(0.932,0.937)</b> | 0.775<br>(0.771,0.778)               |
|                   | XGBoost | <b>0.829</b><br><b>(0.825,0.834)</b> | 0.666<br>(0.656,0.676)               | <b>0.877</b><br><b>(0.865,0.888)</b> | 0.54<br>(0.523,0.558)                | 0.931<br>(0.929,0.933)               | 0.758<br>(0.755,0.761)               |
| 1-year            | LR      | 0.763<br>(0.758,0.767)               | <b>0.635</b><br><b>(0.619,0.65)</b>  | 0.787<br>(0.773,0.802)               | <b>0.458</b><br><b>(0.446,0.471)</b> | 0.894<br>(0.891,0.897)               | 0.788<br>(0.784,0.792)               |
|                   | SVM     | 0.694<br>(0.689,0.699)               | 0.609<br>(0.592,0.625)               | 0.705<br>(0.689,0.72)                | 0.301<br>(0.293,0.308)               | 0.903<br>(0.9,0.906)                 | <b>0.797</b><br><b>(0.794,0.8)</b>   |
|                   | RF      | <b>0.771</b><br><b>(0.766,0.777)</b> | 0.583<br>(0.564,0.603)               | 0.803<br>(0.784,0.823)               | 0.424<br>(0.403,0.444)               | <b>0.918</b><br><b>(0.915,0.92)</b>  | 0.77<br>(0.767,0.773)                |
|                   | XGBoost | 0.766<br>(0.762,0.771)               | 0.557<br>(0.539,0.574)               | <b>0.818</b><br><b>(0.802,0.834)</b> | 0.432<br>(0.413,0.451)               | 0.916<br>(0.914,0.918)               | 0.758<br>(0.755,0.761)               |
| 3-year            | LR      | 0.722<br>(0.716,0.728)               | <b>0.598</b><br><b>(0.577,0.618)</b> | 0.72<br>(0.704,0.736)                | 0.382<br>(0.371,0.393)               | 0.893<br>(0.888,0.897)               | 0.764<br>(0.759,0.768)               |
|                   | SVM     | 0.656<br>(0.649,0.662)               | 0.545<br>(0.522,0.567)               | 0.679<br>(0.654,0.705)               | 0.286<br>(0.274,0.298)               | 0.896<br>(0.892,0.9)                 | <b>0.786</b><br><b>(0.782,0.789)</b> |
|                   | RF      | 0.719<br>(0.713,0.726)               | 0.525<br>(0.507,0.542)               | 0.812<br>(0.794,0.83)                | 0.394<br>(0.377,0.411)               | <b>0.901</b><br><b>(0.898,0.904)</b> | 0.758<br>(0.754,0.762)               |
|                   | XGBoost | <b>0.727</b><br><b>(0.721,0.732)</b> | 0.512<br>(0.495,0.528)               | <b>0.858</b><br><b>(0.839,0.877)</b> | <b>0.469</b><br><b>(0.445,0.492)</b> | <b>0.901</b><br><b>(0.898,0.904)</b> | 0.758<br>(0.754,0.762)               |
| 5-year            | LR      | 0.693<br>(0.686,0.7)                 | 0.616<br>(0.586,0.645)               | 0.668<br>(0.64,0.697)                | 0.353<br>(0.336,0.37)                | 0.898<br>(0.892,0.903)               | 0.767<br>(0.761,0.774)               |
|                   | SVM     | 0.658<br>(0.65,0.665)                | <b>0.648</b><br><b>(0.617,0.679)</b> | 0.647<br>(0.62,0.674)                | 0.285<br>(0.274,0.295)               | 0.904<br>(0.899,0.91)                | <b>0.781</b><br><b>(0.776,0.786)</b> |
|                   | RF      | 0.72<br>(0.712,0.727)                | 0.526<br>(0.503,0.548)               | <b>0.766</b><br><b>(0.736,0.796)</b> | <b>0.394</b><br><b>(0.369,0.418)</b> | 0.91<br>(0.904,0.915)                | 0.759<br>(0.754,0.764)               |
|                   | XGBoost | <b>0.721</b><br><b>(0.713,0.729)</b> | 0.473<br>(0.452,0.494)               | 0.72<br>(0.697,0.743)                | 0.343<br>(0.328,0.359)               | <b>0.915</b><br><b>(0.911,0.919)</b> | 0.756<br>(0.751,0.761)               |

**Table S4.** The performance of RC prediction using ML models across different prediction windows (0, 1, 3, and 5 years), excluding cancer-related features.

| Prediction Window | Model   | AUC (95% CI)                         | Sensitivity (95% CI)                 | Specificity (95% CI)                 | PPV (95% CI)                         | NPV (95% CI)                         | F1 (95% CI)                          |
|-------------------|---------|--------------------------------------|--------------------------------------|--------------------------------------|--------------------------------------|--------------------------------------|--------------------------------------|
| 0-year            | LR      | 0.807<br>(0.803,0.812)               | 0.687<br>(0.672,0.701)               | <b>0.821</b><br><b>(0.809,0.834)</b> | <b>0.45</b><br><b>(0.435,0.465)</b>  | 0.93<br>(0.928,0.932)                | <b>0.848</b><br><b>(0.844,0.851)</b> |
|                   | SVM     | 0.767<br>(0.761,0.772)               | 0.684<br>(0.669,0.7)                 | 0.752<br>(0.738,0.767)               | 0.366<br>(0.355,0.377)               | 0.924<br>(0.921,0.926)               | 0.829<br>(0.826,0.832)               |
|                   | RF      | 0.806<br>(0.802,0.81)                | <b>0.714</b><br><b>(0.701,0.727)</b> | 0.783<br>(0.77,0.795)                | 0.408<br>(0.395,0.421)               | <b>0.933</b><br><b>(0.93,0.935)</b>  | 0.759<br>(0.756,0.762)               |
|                   | XGBoost | <b>0.811</b><br><b>(0.806,0.815)</b> | 0.701<br>(0.687,0.714)               | 0.817<br>(0.805,0.83)                | 0.448<br>(0.434,0.462)               | <b>0.933</b><br><b>(0.93,0.935)</b>  | 0.758<br>(0.755,0.761)               |
| 1-year            | LR      | 0.748<br>(0.743,0.752)               | 0.639<br>(0.623,0.654)               | 0.769<br>(0.756,0.782)               | 0.366<br>(0.354,0.378)               | 0.915<br>(0.912,0.918)               | <b>0.804</b><br><b>(0.801,0.808)</b> |
|                   | SVM     | 0.686<br>(0.68,0.691)                | 0.602<br>(0.583,0.621)               | 0.713<br>(0.695,0.73)                | 0.303<br>(0.295,0.312)               | 0.901<br>(0.898,0.904)               | 0.793<br>(0.791,0.796)               |
|                   | RF      | <b>0.756</b><br><b>(0.751,0.76)</b>  | <b>0.642</b><br><b>(0.627,0.656)</b> | <b>0.778</b><br><b>(0.765,0.791)</b> | 0.376<br>(0.365,0.387)               | <b>0.917</b><br><b>(0.914,0.919)</b> | 0.758<br>(0.755,0.761)               |
|                   | XGBoost | 0.749<br>(0.744,0.753)               | 0.623<br>(0.606,0.641)               | <b>0.778</b><br><b>(0.761,0.795)</b> | <b>0.378</b><br><b>(0.363,0.394)</b> | 0.913<br>(0.91,0.916)                | 0.758<br>(0.755,0.761)               |
| 3-year            | LR      | 0.709<br>(0.703,0.715)               | <b>0.626</b><br><b>(0.607,0.644)</b> | 0.723<br>(0.704,0.741)               | 0.323<br>(0.312,0.335)               | 0.907<br>(0.904,0.91)                | <b>0.789</b><br><b>(0.785,0.793)</b> |
|                   | SVM     | 0.653<br>(0.646,0.659)               | 0.586<br>(0.558,0.613)               | 0.684<br>(0.658,0.71)                | 0.286<br>(0.275,0.298)               | 0.894<br>(0.89,0.898)                | 0.785<br>(0.782,0.789)               |
|                   | RF      | <b>0.724</b><br><b>(0.718,0.73)</b>  | 0.567<br>(0.548,0.586)               | <b>0.804</b><br><b>(0.786,0.821)</b> | <b>0.385</b><br><b>(0.371,0.4)</b>   | 0.904<br>(0.9,0.907)                 | 0.758<br>(0.754,0.762)               |
|                   | XGBoost | <b>0.724</b><br><b>(0.718,0.729)</b> | 0.607<br>(0.581,0.633)               | 0.756<br>(0.731,0.782)               | 0.369<br>(0.349,0.389)               | <b>0.908</b><br><b>(0.904,0.912)</b> | 0.758<br>(0.754,0.762)               |
| 5-year            | LR      | 0.69<br>(0.683,0.697)                | 0.631<br>(0.604,0.659)               | 0.703<br>(0.676,0.73)                | 0.326<br>(0.309,0.343)               | 0.907<br>(0.903,0.911)               | <b>0.795</b><br><b>(0.79,0.801)</b>  |
|                   | SVM     | 0.656<br>(0.648,0.663)               | 0.632<br>(0.602,0.661)               | 0.661<br>(0.632,0.69)                | 0.291<br>(0.278,0.304)               | 0.903<br>(0.897,0.908)               | 0.78<br>(0.775,0.785)                |
|                   | RF      | <b>0.711</b><br><b>(0.704,0.719)</b> | <b>0.672</b><br><b>(0.645,0.699)</b> | 0.687<br>(0.66,0.713)                | <b>0.325</b><br><b>(0.31,0.341)</b>  | <b>0.915</b><br><b>(0.91,0.92)</b>   | 0.756<br>(0.751,0.762)               |
|                   | XGBoost | 0.679<br>(0.672,0.687)               | 0.61<br>(0.58,0.64)                  | <b>0.706</b><br><b>(0.677,0.734)</b> | 0.322<br>(0.306,0.338)               | 0.903<br>(0.898,0.908)               | 0.756<br>(0.751,0.761)               |

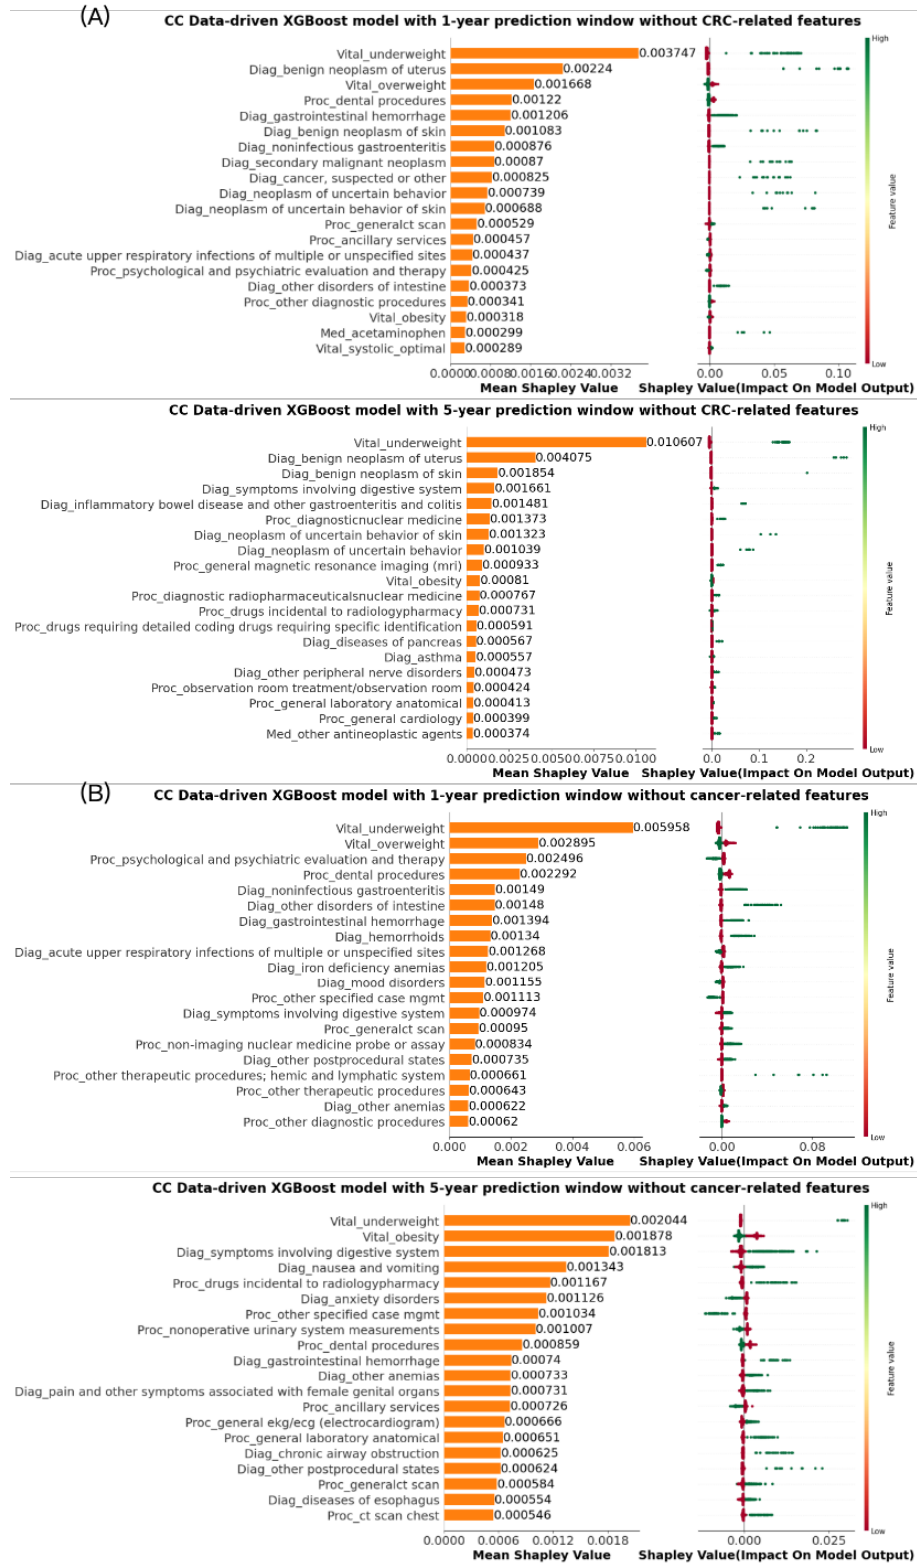

**Figure S1.** SHAP summary plot of the top 20 features in CC prediction using XGBoost models with 1-year and 5-year prediction windows: (A) excluding CRC-related features; (B) excluding cancer-related features. The prefix before the “\_” in the y-axis labels of plots indicates the source of the corresponding features in the PCORnet data model. Specifically, these sources are: Diagnosis (Diag), Procedure (Proc), Medication (Med), Vital Signs (Vital), and Demographics (Demo).

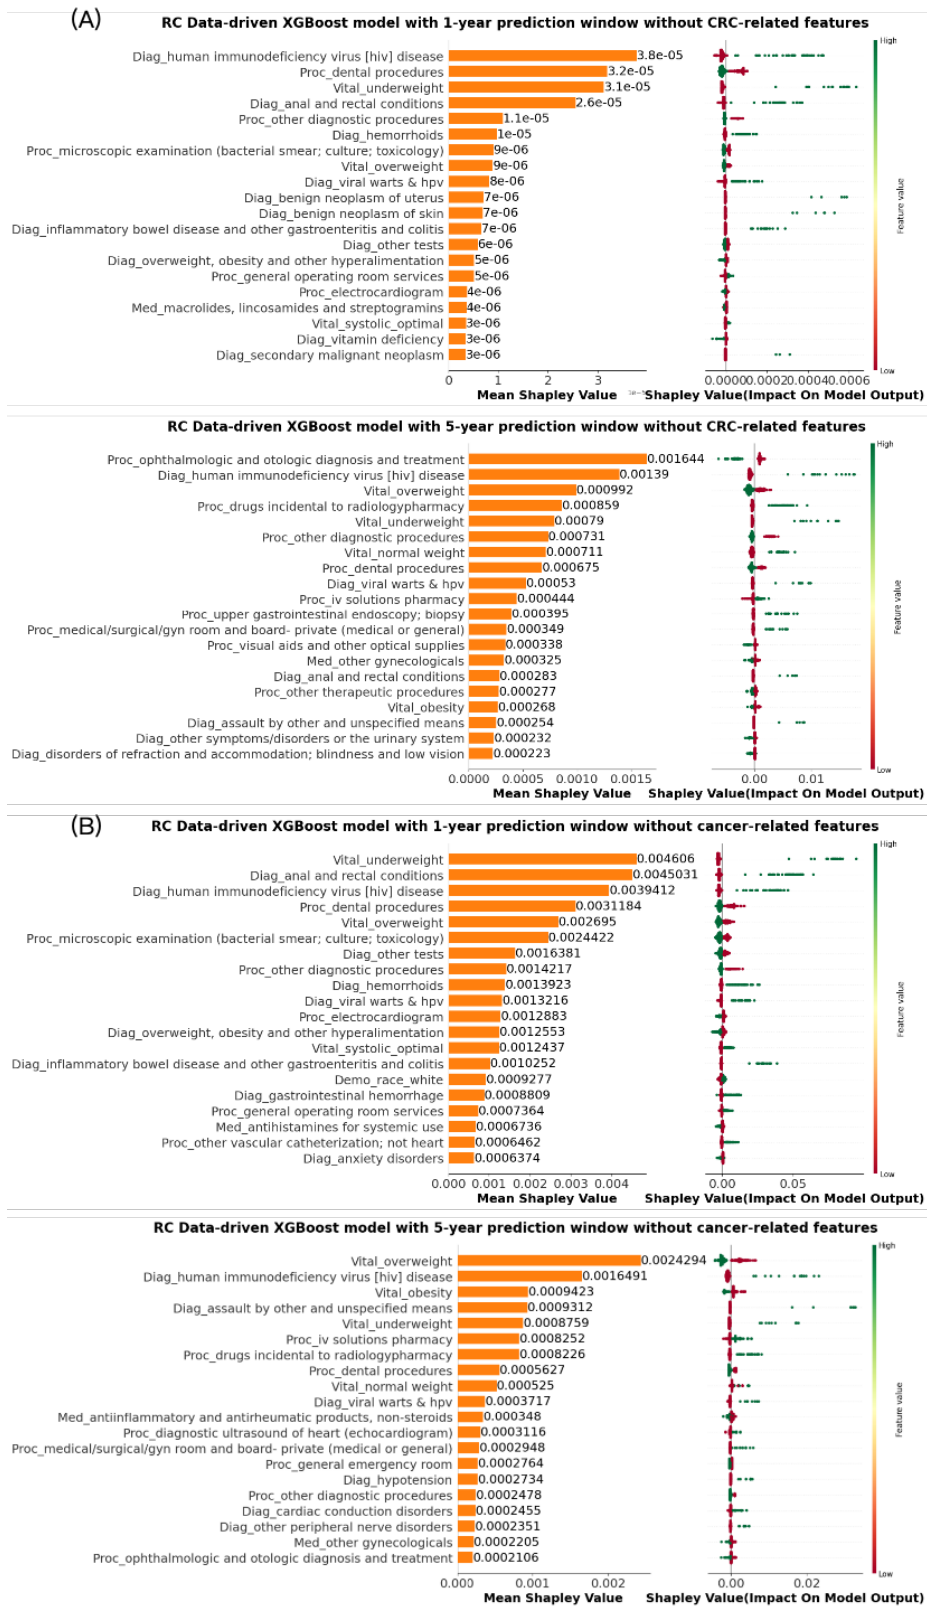

**Figure S2.** SHAP summary plot of the top 20 features in RC prediction using XGBoost models with 1-year and 5-year prediction windows: (A) excluding CRC-related features; (B) excluding cancer-related features.
